# Supplementary material for: Peroxisome Proliferator-Activated Receptor γ Expression Is Inversely Associated with Macroscopic Vascular Invasion in Human Hepatocellular Carcinoma
Source: MDPI journal article supplement (doi:10.3390/ijms17081226), 2016-07-29
Supplement: s1 [file s1]

# Supplementary Materials: Peroxisome Proliferator-Activated Receptor $\gamma$ Expression is Inversely Associated with Macroscopic Vascular Invasion in Human Hepatocellular Carcinoma

Hui-Tzu Hsu, Ming-Ta Sung, Chih-Chun Lee, Yin-Ju Kuo, Chin-Wen Chi, Hsin-Chen Lee and Cheng-Yuan Hsia

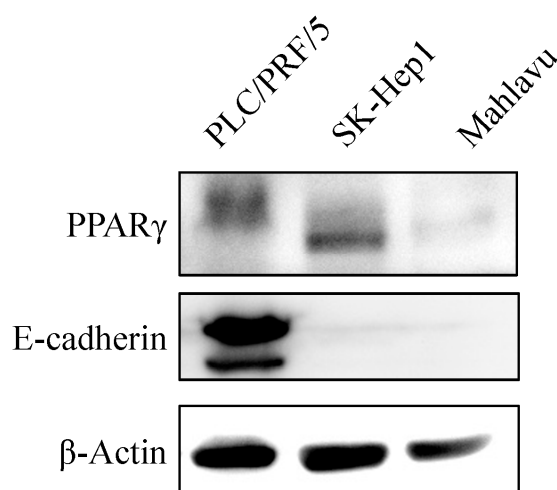

**Figure S1.** Endogenous peroxisome proliferator-activated receptor  $\gamma$  (PPAR $\gamma$ ) and E-cadherin expression in different hepatocellular carcinoma (HCC) cell lines. Western blot was used to detect endogenous PPAR $\gamma$  and E-cadherin expression in PLC/PRF/5, SK-Hep1, and Mahlavu HCC cell lines.

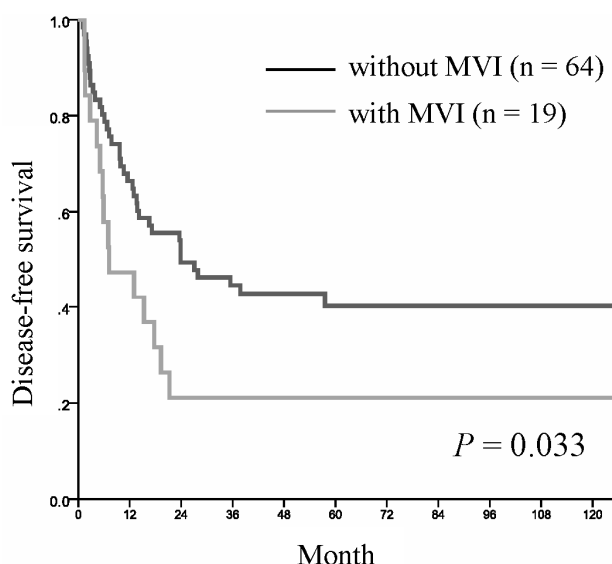

**Figure S2.** The 5-year disease-free survival (DFS) curves of patients underwent curative liver resection for HCC. Kaplan-Meier curves for DFS according to with ( $n = 19$ ) or without ( $n = 64$ ) macroscopic vascular invasion (MVI) in HCC patients.

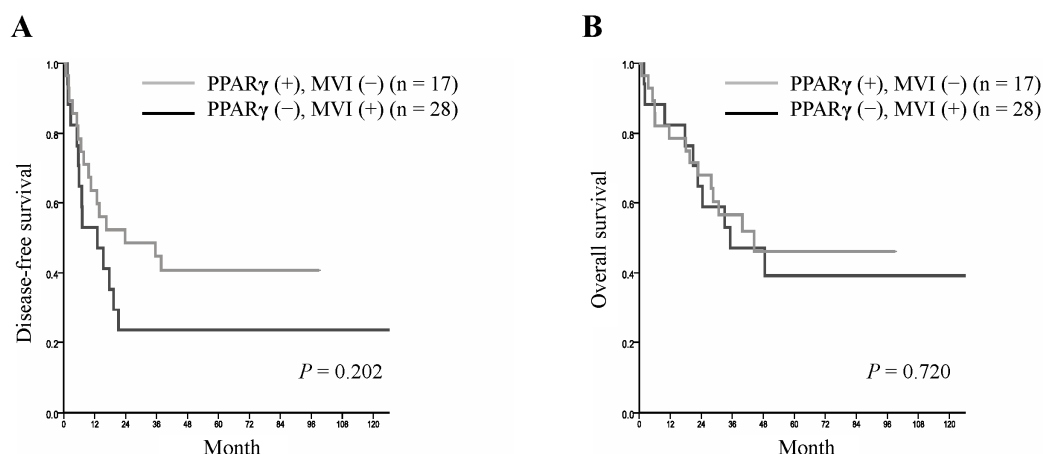

**Figure S3.** The 5-year disease-free survival (DFS) and overall survival (OS) analyses of HCC patients with or without MVI according to PPAR $\gamma$  expression. **(A)** Kaplan–Meier curves for DFS according to patients with high PPAR $\gamma$  expression and without macroscopic vascular invasion (MVI) ( $n = 17$ ) and patients with low PPAR $\gamma$  expression and with MVI ( $n = 28$ ); **(B)** Kaplan–Meier curves for OS according to patients with high PPAR $\gamma$  expression and without MVI ( $n = 17$ ) and patients with low PPAR $\gamma$  expression and with MVI ( $n = 28$ ).

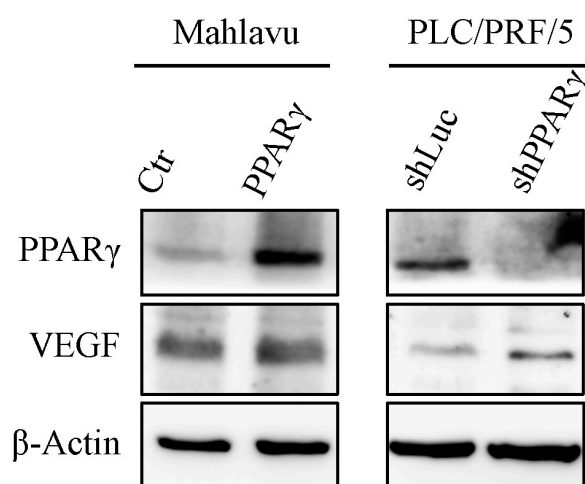

**Figure S4.** Vascular endothelial growth factor (VEGF) expression in PPAR $\gamma$ -overexpressed and PPAR $\gamma$  knockdown HCC cells. Western blot was used to examine VEGF expression in Mahlavu-ctr, Mahlavu-PPAR $\gamma$ , PLC/PRF/5-shLuc, and PLC/PRF/5-shPPAR $\gamma$  cells.
